# Supplementary material
Source: PubMed Central journal article supplement (PMC4082746)
Supplement: NIHMS591412-supplement-Supplementary_Data.pdf [file NIHMS591412-supplement-Supplementary_Data.pdf]

## Supplementary Material

**Figure S1.** Flowchart for Illumina HumanMethylation 450K data handling

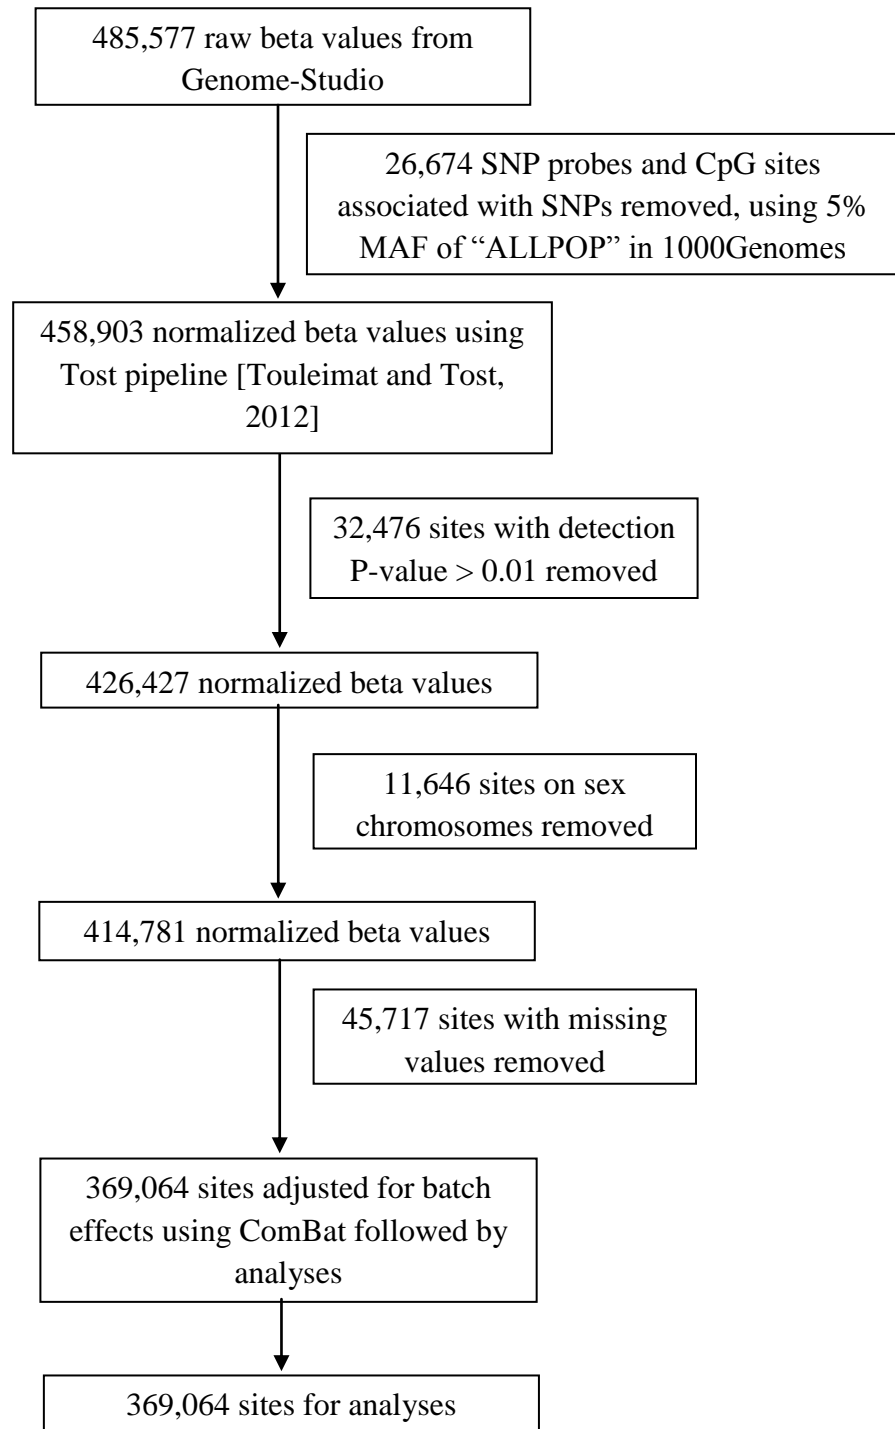

**Figure S2.** Density plots of chip effect and p-values with (red) and without (black) ComBat adjustment

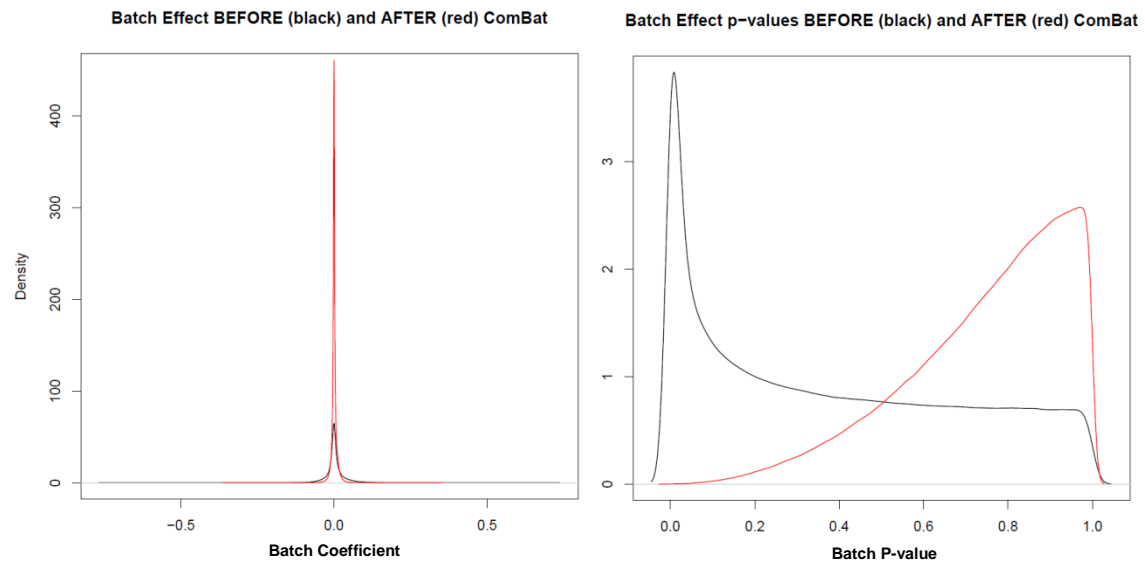

**Table S1.** Primers used for pyrosequencing

| Infinium ID | Gene          | Forward primer                     | Reverse primer (biotin labeled) | Sequencing primer | Sequencing entry                              |
|-------------|---------------|------------------------------------|---------------------------------|-------------------|-----------------------------------------------|
| cg24883732  | <i>TCEB3B</i> | GTAGTTTTGTTTTTGGGG<br>TTG          | CTCCAAACTATAACTCCACATCC         | GAAGTTTGGGGTGGT   | C/tGGTTTTTC/tGTTGTTC/tGG<br>TC/tGTTAG         |
| cg15059639  | <i>MYO3B</i>  | TTGTTTTGGAGTAGAGA<br>GTGTATAGATATT | ACAATCTCCCAATCTAACTTCTACC       | ATTAGTTTGAGAGTT   | C/tGATTTTTGTTTTTTGTAA<br>GAAATGTTTC/tGTTT     |
| cg00218770  | <i>CDH4</i>   | GGAAAGAGAAAAGGTTG<br>GTGATTA       | TCCAAATAACTAACATCCTAAATC        | TATGGAATTTGAGTA   | C/tGTTTTATTGAATTATATC<br>/tGTTAG              |
| cg03333116  | <i>RHBDF1</i> | GTAGGTAGGGAAGRGGG<br>GTAGAG        | CCCAATAAATAATAAATTCCCAATC       | TTAGGAATAGTTGGG   | C/tGAGTATC/tGGTATTTATT<br>TTTGTGGGC/tGATGGAAG |
| cg10090568  | <i>ESRRG</i>  | AAGTGGGTAGGATTGTA<br>GATAAATA      | TAAATCCTCAAACCTTCCTATCATT       | ATTTTTATGTTATTA   | C/tGTGATTTTATA                                |
| cg01667892  | <i>PRDM9</i>  | GTTTTTTGATTGTTGAAT<br>GG           | TTCTCTCAAATCCCTCAAAAATA         | TTGATTGTTGAATGG   | C/tGGGTTC/tGTTTTGGTTTT<br>C/tGTGTTG           |

**Table S2.** Average pairwise correlation across multiple loci for each CpG site

| CpG site   | Gene          | Location | Average pairwise correlation <sup>a</sup> | R <sup>2</sup> between duplicates |
|------------|---------------|----------|-------------------------------------------|-----------------------------------|
| cg24883732 | <i>TCEB3B</i> | Island   | 0.97                                      | 0.97                              |
| cg15059639 | <i>MYO3B</i>  | -        | 0.99                                      | 0.99                              |
| cg00218770 | <i>CDH4</i>   | N_Shore  | 0.44                                      | 0.91                              |
| cg03333116 | <i>RHBDF1</i> | Island   | 0.10                                      | 0.75                              |
| cg10090568 | <i>ESRRG</i>  | -        | -                                         | 0.97                              |
| cg01667892 | <i>PRDM9</i>  | -        | 0.89                                      | 0.97                              |

<sup>a</sup> Spearman correlation was used to calculate pairwise correlation between loci.

N\_Shore, North shore which are regions flanking island

**Table S3.** Top 20 CpG sites with the largest M-value difference in New Cases compared to Persistent Controls

| CpG site   | Gene             | New Cases<br>M-value difference <sup>a</sup> | Persistent Controls<br>M-value difference <sup>a</sup> | Lower<br>95% CI | Upper<br>95% CI | <i>P</i> <sup>b</sup> |
|------------|------------------|----------------------------------------------|--------------------------------------------------------|-----------------|-----------------|-----------------------|
| cg24883732 | <i>TCEB3B</i>    | 1.23                                         | -0.42                                                  | -2.99           | -0.31           | 0.02                  |
| cg15059639 | <i>MYO3B</i>     | -1.04                                        | 0.62                                                   | 0.69            | 2.63            | 0.003                 |
| cg03065888 | <i>CYC1</i>      | 0.93                                         | -0.25                                                  | -1.94           | -0.41           | 0.005                 |
| cg19296405 | <i>KIAA1683</i>  | -1.08                                        | 0.12                                                   | 0.46            | 1.92            | 0.003                 |
| cg00218770 | <i>CDH4</i>      | 1.07                                         | -0.22                                                  | -2.38           | -0.19           | 0.02                  |
| cg03333116 | <i>RHBDF1</i>    | 1.05                                         | -0.66                                                  | -2.45           | -0.97           | 0.0002                |
| cg06352616 | <i>CCDC154</i>   | 0.79                                         | -0.19                                                  | -2.27           | 0.31            | 0.12                  |
| cg03371700 | <i>JAKMIP3</i>   | 0.94                                         | -0.01                                                  | -1.8            | -0.1            | 0.03                  |
| cg11511175 | <i>AGAP2</i>     | 0.72                                         | -0.36                                                  | -2.2            | 0.03            | 0.06                  |
| cg17900076 | <i>LOC642597</i> | -0.76                                        | 0.46                                                   | 0.3             | 2.13            | 0.01                  |
| cg24405174 | <i>PL-5283</i>   | 0.83                                         | 0.12                                                   | -1.38           | -0.04           | 0.04                  |
| cg00028056 | <i>CHPF</i>      | 0.87                                         | -0.33                                                  | -2.03           | -0.37           | 0.01                  |
| cg02916425 | <i>C2orf81</i>   | -0.94                                        | 0.24                                                   | 0.03            | 2.34            | 0.05                  |
| cg10090568 | <i>ESRRG</i>     | -0.7                                         | 0.11                                                   | 0.33            | 1.31            | 0.002                 |
| cg27370573 | <i>PPAP2C</i>    | 0.99                                         | -0.01                                                  | -1.89           | -0.1            | 0.03                  |
| cg22217449 | <i>PCNT</i>      | 0.81                                         | -0.44                                                  | -2.3            | -0.19           | 0.03                  |
| cg07664579 | <i>SLC6A3</i>    | 0.94                                         | 0.02                                                   | -1.62           | -0.23           | 0.01                  |
| cg01667892 | <i>PRDM9</i>     | -0.76                                        | -0.08                                                  | 0.09            | 1.27            | 0.03                  |
| cg25148456 | <i>MAP3K1</i>    | 0.8                                          | 0.09                                                   | -1.35           | -0.07           | 0.03                  |
| cg02749948 | <i>TNXB</i>      | -0.86                                        | 0.25                                                   | 0.11            | 2.1             | 0.03                  |

<sup>a</sup> M-value differences were calculated as M-value at follow-up (2009–2011) subtracted by M-value at baseline (2001–2003).

<sup>b</sup> P-values were obtained from two-sample t-tests for comparisons of M-value differences between New Cases and Persistent Controls.
